# Supplementary material for: Comprehensive Analysis of Chloroplast Genome of Hibiscus sinosyriacus: Evolutionary Studies in Related Species and Genera
Source: MDPI journal article supplement (doi:10.3390/f14112221), 2023-11-10
Supplement: s1 [file s1]

[illegible]

|         |               |     |     |     |     |     |     |     |     |     |
|---------|---------------|-----|-----|-----|-----|-----|-----|-----|-----|-----|
| 43      | <i>rpl33</i>  | TAA |
| 44      | <i>rps18</i>  | TAG |
| 45      | <i>rpl20</i>  | TAA |
| 46      | <i>rps12</i>  | TAA |
| 47      | <i>clpP1</i>  | TAA |
| 48      | <i>psbB</i>   | TGA |
| 49      | <i>psbT</i>   | TGA |
| 50      | <i>psbN</i>   | TGA |
| 51      | <i>psbH</i>   | TAG |
| 52      | <i>petB</i>   | TAG |
| 53      | <i>petD</i>   | TAA |
| 54      | <i>rpoA</i>   | TAG |
| 55      | <i>rps11</i>  | TAG |
| 56      | <i>rpl36</i>  | TAA |
| 57      | <i>infA</i>   | TAG |
| 58      | <i>rps8</i>   | TAA |
| 59      | <i>rpl14</i>  | TAA |
| 60      | <i>rpl16*</i> | TAG | TAG | TAA | TAG | TAG | TAG | TAG | TAG | TAG |
| 61      | <i>rps3</i>   | TAA |
| 62      | <i>rpl22</i>  | TAA |
| 63      | <i>rps19</i>  | TAA |
| 64      | <i>rpl2</i>   | TAG |
| 65      | <i>rpl23</i>  | TAA |
| 66      | <i>ycf2</i>   | TAA |
| 67      | <i>ndhB</i>   | TAG |
| 68      | <i>rps7</i>   | TAA |
| 69      | <i>ndh5</i>   | TAA |
| 70      | <i>rpl32</i>  | TAA |
| 71      | <i>ccsA*</i>  | TGA | TGA | TGA | TGA | TGA | TAA | TGA | TGA | TGA |
| 72      | <i>ndhD</i>   | TAG |
| 73      | <i>psaC</i>   | TGA |
| 74      | <i>ndhE</i>   | TAA |
| 75      | <i>ndhG</i>   | TAA |
| 76      | <i>ndhI</i>   | TAA |
| 77      | <i>ndhA</i>   | TAA |
| 78      | <i>ndhH</i>   | TGA |
| 79      | <i>rps15</i>  | TAA |
| 80      | <i>ycf1</i>   | TAA |
| 81      | <i>rps7</i>   | TAA |
| 82      | <i>ndhB</i>   | TAG |
| 83      | <i>ycf2</i>   | TAA |
| 84      | <i>rpl23</i>  | TAA |
| 85      | <i>rpl2</i>   | TAG |
| Number  | TAA           | 48  | 48  | 48  | 47  | 47  | 48  | 48  | 47  | 47  |
| of stop | TGA           | 18  | 18  | 18  | 18  | 17  | 17  | 18  | 17  | 18  |
| codon   | TAG           | 19  | 19  | 19  | 20  | 21  | 20  | 19  | 21  | 20  |

\*Genes with interspecific variation.
